# Supplementary material for: Targeting the Cell Stress Response of Plasmodium falciparum to Overcome Artemisinin Resistance
Source: PubMed Central journal article supplement (PMC4406523; doi:10.1371/journal.pbio.1002132), 2015-04-22
Supplement: pbio.1002132.s012.pdf [file pbio.1002132.s012.pdf]

**Table S1. Quality of Illumina MiSeq genome sequence data.**

| Strain | Total sequence bases | Number of paired reads (2x) | Number of mapped reads (1x) | Percentage of reference sequenced | Percentage of reference with $\geq 5$ reads | Mean coverage $\pm$ SD | Mean mapping quality |
|--------|----------------------|-----------------------------|-----------------------------|-----------------------------------|---------------------------------------------|------------------------|----------------------|
| PL1    | 1,695,850,781        | 6,253,736                   | 3,165,344                   | 96.17%                            | 94.07%                                      | 73 $\pm$ 40            | 58.22                |
| PL2    | 1,840,022,251        | 6,843,040                   | 3,462,925                   | 96.37%                            | 93.92%                                      | 79 $\pm$ 46            | 58.13                |
| PL5    | 1,898,391,977        | 7,052,785                   | 3,572,673                   | 95.73%                            | 94.64%                                      | 82 $\pm$ 39            | 58.10                |
| PL7    | 1,811,579,470        | 6,710,022                   | 3,393,759                   | 95.85%                            | 94.37%                                      | 78 $\pm$ 38            | 58.14                |
