# Supplementary material for: Targeting the Cell Stress Response of Plasmodium falciparum to Overcome Artemisinin Resistance
Source: PubMed Central journal article supplement (PMC4406523; doi:10.1371/journal.pbio.1002132), 2015-04-22
Supplement: pbio.1002132.s013.pdf [file pbio.1002132.s013.pdf]

**Table S2. SNP analysis of Pailin strains at loci reported to be associated with differences in ART sensitivity.**

Kelch 13 (K13), *P. falciparum* Multi-Drug Resistance Gene-2 (MDR2), apicoplast ribosomal protein (ARPS10), ferredoxin (FD), PfCRT, protein phosphatase (PPH), phosphoinositide-binding protein (PIB7), Multi-Drug Resistance Gene-1 (MDR1), Ubiquitin Binding Protein-1 (UBP1), Multidrug Resistance Protein-1 (MRP1), cyclic nucleotide-binding protein (cNBP) and the 3' UTR of the DNA polymerase catalytic subunit. No artemisinin resistance associated mutations were observed in RAD5 or SERCA.

| Gene   | PlasmoDB ID              | NT      | SNP type | Codon  | 3D7ref | PL1 | PL2 | PL5 | PL7 |
|--------|--------------------------|---------|----------|--------|--------|-----|-----|-----|-----|
| K13    | PF3D7_1343700            | 1725259 | NSY      | C580Y  | C      | C   | C   | T   | C   |
|        |                          | 1725382 | NSY      | R539T  | C      | C   | C   | C   | G   |
|        |                          | 1725521 | NSY      | Y493H  | A      | G   | A   | A   | A   |
| MDR2   | PF3D7_1447900            | 1956225 | NSY      | T484I  | G      | A   | G   | A   | A   |
| ARPS10 | PF3D7_1460900.1          | 2481070 | NSY      | V127M  | G      | A   | G   | A   | A   |
| FD     | PF3D7_1318100            | 748395  | NSY      | D193Y  | C      | A   | A   | A   | A   |
| PfCRT  | PF3D7_0709000            | 405362  | NSY      | N326S  | A      | G   | G   | G   | G   |
|        |                          | 405600  | NSY      | I356T  | T      | C   | T   | C   | C   |
| PPH    | PF3D7_1012700            | 490720  | NSY      | V1157L | G      | G   | C   | C   | C   |
| PIB7   | PF3D7_0720700            | 405362  | NSY      | C1484F | G      | G   | G   | T   | T   |
| MDR1   | PF3D7_0523000            | 405600  | NSY      | N86Y   | A      | A   | T   | A   | A   |
| UBP1   | PF3D7_0104300 / PFA0220w | 490720  | NSY      | E1528D | A      | A   | A   | C   | A   |
| MRP1   | PF3D7_0112200            | 896660  | NSY      | I876V  | A      | G   | G   | G   | A   |
| NBP    | PF3D7_1417400            | 958145  | NSY      | S993L  | C      | T   | C   | T   | T   |
| DNApol | PF3D7_1017000            | 194852  | 3' UTR   | 95     | T      | A   | A   | A   | T   |

Legend:

SYN SYNONYMOUS

NSY NON-SYNONYMOUS

Codon Codon containing a SNP reported to be associated with ART resistance ([17], [26], [18])

HOMOZYGOUS\_REFERENCE

HOMOZYGOUS\_ALTERNATE
