# Supplementary material for: Targeting the Cell Stress Response of Plasmodium falciparum to Overcome Artemisinin Resistance
Source: PubMed Central journal article supplement (PMC4406523; doi:10.1371/journal.pbio.1002132), 2015-04-22
Supplement: pbio.1002132.s014.pdf [file pbio.1002132.s014.pdf]

**Table S3. Parameters used in simulation presented in Figure 7A\***

| <b>Parameter</b>                                | <b>Value</b> | <b>Comments</b>                            |
|-------------------------------------------------|--------------|--------------------------------------------|
| <u><i>DHA Pharmacokinetic Parameters</i></u>    |              |                                            |
| $C_{max}$                                       | 2820 nM      | Maximum <i>in vivo</i> concentration       |
| Time to $C_{max}$                               | 1 h          | Time to reach $C_{max}$ (linear)           |
| Elimination half-life                           | 51 min       |                                            |
| <u><i>Initial Parasite Age Distribution</i></u> |              |                                            |
| $\mu_{age}$                                     | 7 h          | Average parasite age                       |
| $\sigma_{age}$                                  | 7 h          | Standard deviation of age distribution     |
| <u><i>Age Distribution Broadening</i></u>       |              |                                            |
| $\sigma_{broad}$                                | 3 h          | Standard deviation per 24 h period         |
| <u><i>Parasite Replication</i></u>              |              |                                            |
| Amplification                                   | 10 per cycle |                                            |
| <u><i>Sequestration Parameters</i></u>          |              |                                            |
| $a_b$                                           | 15 h         | Parasite age at which sequestration begins |
| $a_{50}$                                        | 18 h         | Parasite age at which 50% are sequestered  |
| <u><i>Growth Retardation Parameters</i></u>     |              |                                            |
| Growth delay                                    | 6 h          |                                            |
| Time over which delay occurs                    | 12 h         |                                            |

\* See S1 Appendix for detailed description of parameters
